# Supplementary material for: Developments in the management and treatment of pulmonary embolism
Source: PubMed Central journal article supplement — Eur Respir Rev. 2015 Sep;24(137):484–97. doi: 10.1183/16000617.00006614 (PMC9487690; doi:10.1183/16000617.00006614), 2015-09
Supplement: ERR-0066-2014_Limbrey.pdf [file ERR-0066-2014_Limbrey.pdf]

Warning: This form is not supported with the current version of Acrobat or Adobe Reader.  
Upgrade to the latest version for full support.
